# Supplementary material for: Short-term progression risk stratification in glioblastoma using post-resection structural connectivity biomarkers
Source: Research Square preprint supplement (doi:10.21203/rs.3.rs-8614285/v1), 2026-02-18
Supplement: Supplementary file 1 [file 15bbe5f64e7677e250c2d2ac.docx]

**Supplementary materials**

**Title:** Short-term progression risk stratification in glioblastoma using post-resection structural connectivity biomarkers

**Methods**

**1.Follow-up MRI of patients with GBM**

**1.1. Conventional sequences and parameters:**

| Table S1 Conventional sequences and parameters | | | | | |
| --- | --- | --- | --- | --- | --- |
| Scanner | Skyra | | | | |
| Sequence | T2WI | DWI | T1WI enhancement | | |
| Direction | TRA | TRA | SAG | TRA | COR |
| TR (ms) | 3950 | 5200 | 240 | 240 | 240 |
| TE (ms) | 99 | 80 | 2.47 | 2.47 | 2.47 |
| Thickness (mm) | 5 | 5 | 5 | 5 | 5 |
| Slice gap (mm) | 1.5 | 1.5 | 1.5 | 1.5 | 1.5 |
| Slice number | 21 | 21 | 17 | 21 | 15 |
| Matrix | 320×320 | 256×256 | 320×252 | 300×320 | 320×252 |
| FOV (mm) | 205×240 | 205×240 | 234×274 | 205×240 | 215×230 |
| MRI, magnetic resonance imaging; T2WI, T2-weighted image; DWI, diffusion-weighted imaging; T1WI, T1-weighted image; TRA, transverse plane; SAG, sagittal plane; COR, coronal plane; TR, repetition time; TE, echo time; FOV, field of vision. | | | | | |

**1.2 Functional sequences and parameters:**

① **ASL**: axial three-dimensional pseudo-continuous ASL (3D PCASL) of five post-label delay (PLD) was used from the skull base to the overhead. Repetition time (TR) =4,110 ms, echo time (TE) =37.78 ms, slice thickness =3.0 mm, slice number =40, slice gap =0 mm, field of view (FOV) =240 mm × 240 mm, voxel size =2.5 mm × 2.5 mm × 3.0 mm, PLD =500, 1,000, 1,500, 2,000, and 2,500 ms, scan time =7 min 12 s.

② **DSC**: DSC PWI was performed using a gradient-echo echo-planar imaging protocol. A dynamic bolus of a standard dose of 0.1 mmol/kg gadopentetate dimeglumine (Magnevist; Beijing Beilu Pharmaceutical Co., Ltd., Beijing, China) delivered at a rate of 3 mL/s using an MRI compatible power injector [Spectris Solaris EP; Bayer (China) Co., Ltd., Shanghai, China]. The contrast bolus was followed by 20 mL of saline at the same injection rate. The imaging parameters were as follows: TR/TE =1,500/30 ms; flip angle =90°; FOV =240 mm × 240 mm; slice thickness/gap =5 mm/1.5 mm; slice number =21; matrix=128×128; 60 dynamics and total acquisition time =1 min and 38 s.

③ **DCE**: using the axial T1WI volumetric interpolated breath-hold examination (VIBE). The T1WI-VIBE sequence was firstly scanned at 2- and 10-degree flip angles, followed by 30 measurements dynamic enhancement scan and 15-degree flip angles. The timing of contrast injection was chosen at the end of the 5th phase. The contrast agent (gadopentetate dimeglumine, Beijing Beilu Pharmaceutical Co., Ltd.) was injected with a rate of 2.0 mL/s and a total injection of 0.1 mmol/kg. The contrast bolus was followed by 20 mL of saline at the same injection rate. The parameters: TR/TE =4.98/1.82 ms; FOV =250 mm × 250 mm; slice thickness =2 mm; voxel size =1.4 mm × 1.4 mm × 2.0 mm; slice number =60; slice gap =0.4 mm; matrix =224×224.

④ **MRS**: two-dimensional 1H multivoxel point-resolved spectroscopy was used. The ROI included regions of abnormal enhancement, perilesional edema, and contralateral/adjacent normal brain tissue, avoided the adjacent skull, hemorrhage. The parameters: TR/TE =1,700/135 ms; voxel size =10 mm × 10 mm × 15 mm; total acquisition time =6 min 53 s.

A small portion of our data were evaluated for lesion recurrence through functional MRI. When collecting functional images, i.e., ASL, DCE, structural images (3D T1WI sequence, resolution 1 mm × 1 mm × 1 mm) are simultaneously captured. The post-processing of ASL and DCE is based on the corresponding modules in the Syngo via workstation, which register functional images with 3D structural images.

**2.DTI examination and parameters:**

| Table S2 DTI examination and parameters | | | | | | | |
| --- | --- | --- | --- | --- | --- | --- | --- |
| Parameters | GBM | | | | Healthy controls | | |
| T2WI | FLAIR | T1WI enhancement | DTI | T2WI | 3D-T1 MPRAGE | DTI |
| Scanner | Skyra | | | | Prisma | | |
| Direction | TRA | TRA | TRA | TRA | TRA | SAG | TRA |
| TR (ms) | 15130 | 14080 | 220 | 10700 | 3200 | 1560 | 8000 |
| TE (ms) | 100 | 99 | 3.07 | 72 | 99 | 1.65 | 64 |
| Thickness (mm) | 2 | 2 | 2 | 2 | 5 | 1 | 2 |
| Slice gap (mm) | 0 | 0 | 0 | 0 | 1.5 | 0 | 0 |
| Slice number | 80 | 80 | 80 | 80 | 19 | 176 | 80 |
| Matrix | 320×320 | 256×256 | 256×256 | 128×128 | 384×288 | 256×256 | 112×112 |
| FOV (mm) | 256×256 | 256×256 | 256×256 | 256×256 | 220×220 | 256×256 | 224×224 |
| b value | - | - | - | 0, 1000 | - | - | 0, 1000 |
| Direction number | - | - | - | 20 | - | - | 20 |
| DTI, diffusion tensor imaging; T2WI, T2-weighted image; FLAIR, fluid attenuated inversion recovery; T1WI, T1-weighted image; TRA, transverse plane; SAG, sagittal plane; TR, repetition time; TE, echo time; FOV, field of vision. | | | | | | | |

**3.The detailed methodology and parameter configurations for DTI data analysis**

**DTI data preprocessing:** 1) Format conversion: apply the dcm2Niix tool in the MRIcron software package to convert the raw data of all enrolled patients and healthy control from Dicom format to nii.gz format and save them. 2) Skull stripping: the FMRIB'S software library (FSL) was used to remove the skull of all data through for loop, and the failed data were manually adjusted using 3D Slicer software. 3) Eddy current correction: the FSL eddy current tool (v.6.0) was used to correct eddy currents and subject head motion in DTI images. 4) Image flip: using the Matlab platform and SPM software (Display tool), the direction of DTI images was checked, and the data that did not conform to the standard direction was reset and saved. 5) Registration: firstly, register the B0 image with the structural image (FLAIR image of the patients and 3D-T1 MPRAGE image of the healthy controls), then register the structural image to the MNI-152 standard space, and finally register the Automatic Anatomical Labelling (AAL) atlas of the standard space with the structural image to obtain the individual AAL template, as shown in **Supplementary Figure S1**.The names of cerebral regions in the detailed AAL template are shown in **Supplementary Table S3**.

**Fiber tracking of the whole brain:** The specific steps are as follows using DSI Studio software. 1) Obtain SRC files: import individual nii.gz format DTI data to generate the SRC files and save them. 2) Reconstruction: the brain template for fiber tracking was established, which included all cerebellar and cerebral tissues, and then the DTI reconstruction method was selected. 3) Delineated ROI: the medulla oblongata level was selected, and the cerebellar tissue at the same level was included along the cerebellar margin. 4) Tracking fibers: tracked all enrolled patients and healthy control’s fibers except for ROI, with a maximum fiber count of 600000 strips, a step length of 1.0 mm, and a tracking fiber length range of 30-300 (mm). The threshold of tracking curvature was set to 0.2 (60°). When fibers entered the cortical/subcortical region, they terminated and were retained. If fibers entered the cerebrospinal fluids in the ventricles, they were discarded. 5) Saved fibers: screened duplicate fibers, separated and deleted them, and finally exported all tracked fibers in. trk format for saving.

**Fiber splitting of the cerebrum:** Import the. trk format file of the tracked fibers into the Matlab platform. Based on the individual AAL template, establish a fiber connection matrix of the whole brain (included cerebral and cerebellum) in the individual AAL template. Then split the fiber connections between two brain regions and save them. Next, delete the connections of non cerebral brain regions in the fiber connection file. Finally, fiber connections between cerebral brain regions (i.e. 90 cerebral brain regions) were obtained for all individuals in the patients and healthy controls.


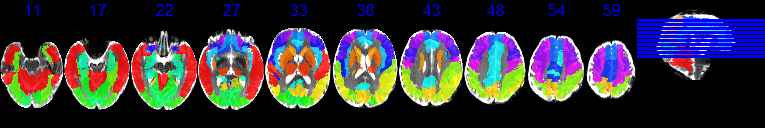

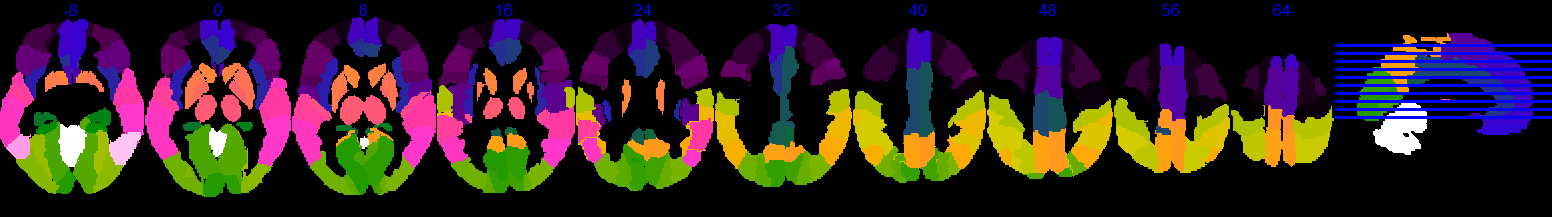

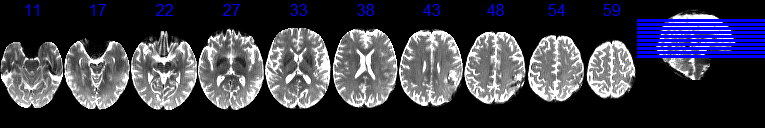


Figure S1. Individual AAL template. The first row is the AAL atlas of MNI standard space, the second row is the original B0 image of the patient, the third row is the AAL atlas aligned to the individual space.

| Table S3 AAL atlas | | |
| --- | --- | --- |
| Index (Left -Right) | Cerebral regions | Abbreviation |
| 1 - 2 | Precental gyrus | PreCG |
| 3 - 4 | Superior frontal gyrus, dorsolateral | SFG dor |
| 5 - 6 | Superior frontal gyrus, orbital part | ORB sup |
| 7 - 8 | Middle frontal gyrus | MFG |
| 9 - 10 | Middle frontal gyrus, orbital part | ORB mid |
| 11 - 12 | Inferior frontal gyrus, opercular part | IFG operc |
| 13 - 14 | Inferior frontal gyrus, triangular part | IFG triang |
| 15 - 16 | Inferior frontal gyrus, orbital part | ORB inf |
| 17 - 18 | Rolandic operculum | ROL |
| 19 - 20 | Supplementary motor area | SMA |
| 21 - 22 | Olfactory cortex | OLF |
| 23 - 24 | Superior frontal gyrus, medial | SFG med |
| 25 - 26 | Superior frontal gyrus, medial orbital | ORB supmed |
| 27 - 28 | Gyrus rectus | REC |
| 29 - 30 | Insula | INS |
| 31 - 32 | Anterior cingulate and paracingulate gyri | ACG |
| 33 - 34 | Median cingulate and paracingulate gyri | DCG |
| 35 - 36 | Posterior cingulate gyrus | PCG |
| 37 - 38 | Hippocampus | HIP |
| 39 - 40 | Parahippocampal gyrus | PHG |
| 41 - 42 | Amygdala | AMYG |
| 43 - 44 | Calcarine fissure and surrounding cortex | CAL |
| 45 - 46 | Cuneus | CUN |
| 47 - 48 | Lingual gyrus | LING |
| 49 - 50 | Superior occipital gyrus | SOG |
| 51 - 52 | Middle occipital gyrus | MOG |
| 53 - 54 | Inferior occipital gyrus | IOG |
| 55 - 56 | Fusiform gyrus | FFG |
| 57 - 58 | Postcentral gyrus | PoCG |
| 59 - 60 | Superior parietal gyrus | SPG |
| 61 - 62 | Inferior parietal, but supramarginal and  angular gyri | IPL |
| 63 - 64 | Supramarginal gyrus | SMG |
| 65 - 66 | Angular gyrus | ANG |
| 67 - 68 | Precuneus | PCUN |
| 69 - 70 | Paracentral lobule | PCL |
| 71 - 72 | Caudate nucleus | CAU |
| 73 - 74 | Lenticular nucleus, putamen | PUT |
| 75 - 76 | Lenticular nucleus, pallidum | PAL |
| 77 - 78 | Thalamus | THA |
| 79 - 80 | Heschl gyrus | HES |
| 81 - 82 | Superior temporal gyrus | STG |
| 83 - 84 | Temporal pole: superior temporal gyrus | TPO sup |
| 85 - 86 | Middle temporal gyrus | MTG |
| 87 - 88 | Temporal pole: middle temporal gyrus | TPO mid |
| 89 - 90 | Inferior temporal gyrus | ITG |

**Supplementary Results**


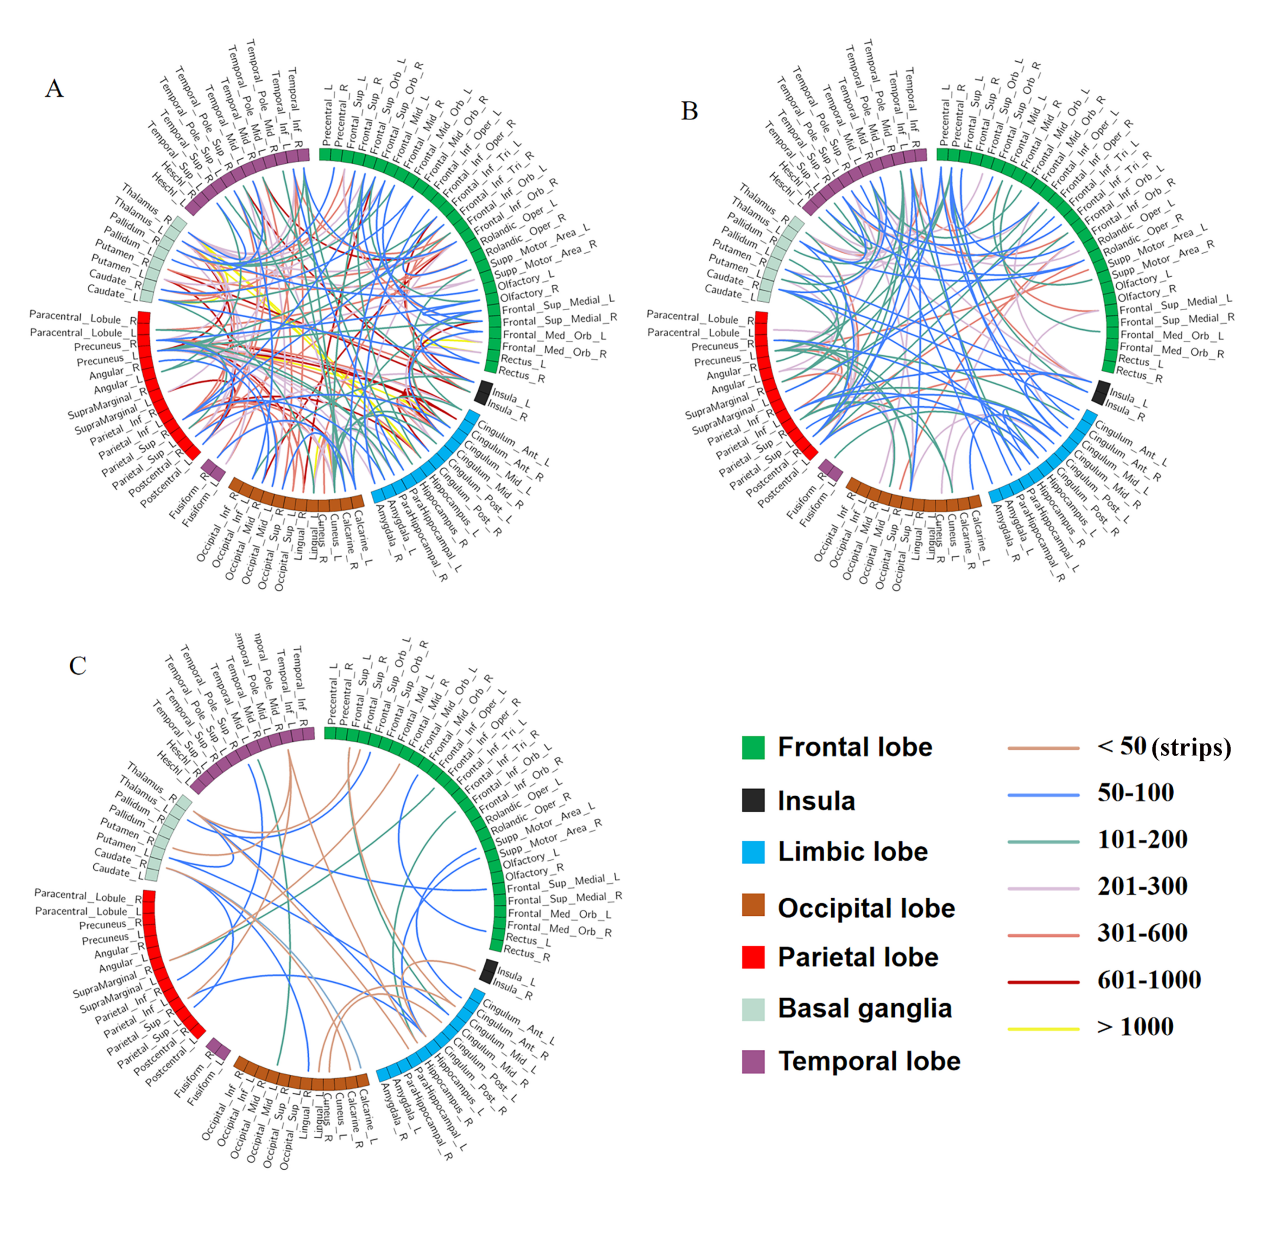


Figure S2. The top 30 pairs of fiber connectivity in every level for the three types of disrupted cerebral regions. Tumor disrupted cerebral regions (A), distant disrupted cerebral regions (B), indirect disrupted cerebral regions (C).

| Table S4 Comparison of the disrupted fibers in different cerebral lobes | | | | | |
| --- | --- | --- | --- | --- | --- |
| Cerebral lobes | category of disrupted cerebral regions | number of patient | number of fibers [P50(P25, P75)] | F | *P* value |
| Frontal | distant disrupted cerebral regions | 38 | 43.1（34.1，62.4） | 2.13 | 0.34 |
| indirect disrupted cerebral regions | 24 | 38.4（12.4，54.0） |
| tumor disrupted cerebral regions | 38 | 44.9（35.3，58.2） |
| Temporal | distant disrupted cerebral regions | 33 | 35.9（22.4，47.0）* + | 46.6 | **<0.001** |
| indirect disrupted cerebral regions | 23 | 8.0（3.5，12.5）* # |
| tumor disrupted cerebral regions | 33 | 47.0（39.1，55.9）+ # |
| Parietal | distant disrupted cerebral regions | 23 | 37.3（29.8，48.0）* | 30.6 | **<0.001** |
| indirect disrupted cerebral regions | 16 | 20.3（7.0，26.5）* # |
| tumor disrupted cerebral regions | 23 | 54.6（47.0，65.3）# |
| Occipital | distant disrupted cerebral regions | 19 | 41.5（9.1，53.5） | 4.97 | 0.08 |
| indirect disrupted cerebral regions | 14 | 20.3（10.9，26.4） |
| tumor disrupted cerebral regions | 19 | 41.2（22.0，55.4） |
| All significance values are shown in bold. The Dunn multiple comparison test was used for the post hoc analysis. * represents a difference in the number of fibers between the distant disrupted cerebral regions and the indirect disrupted cerebral regions, + represents a difference in the number of fibers between the tumor disrupted cerebral regions and the distant disrupted cerebral regions, and # represents a difference in the number of fibers between the tumor disrupted cerebral regions and the indirect disrupted cerebral regions. | | | | | |


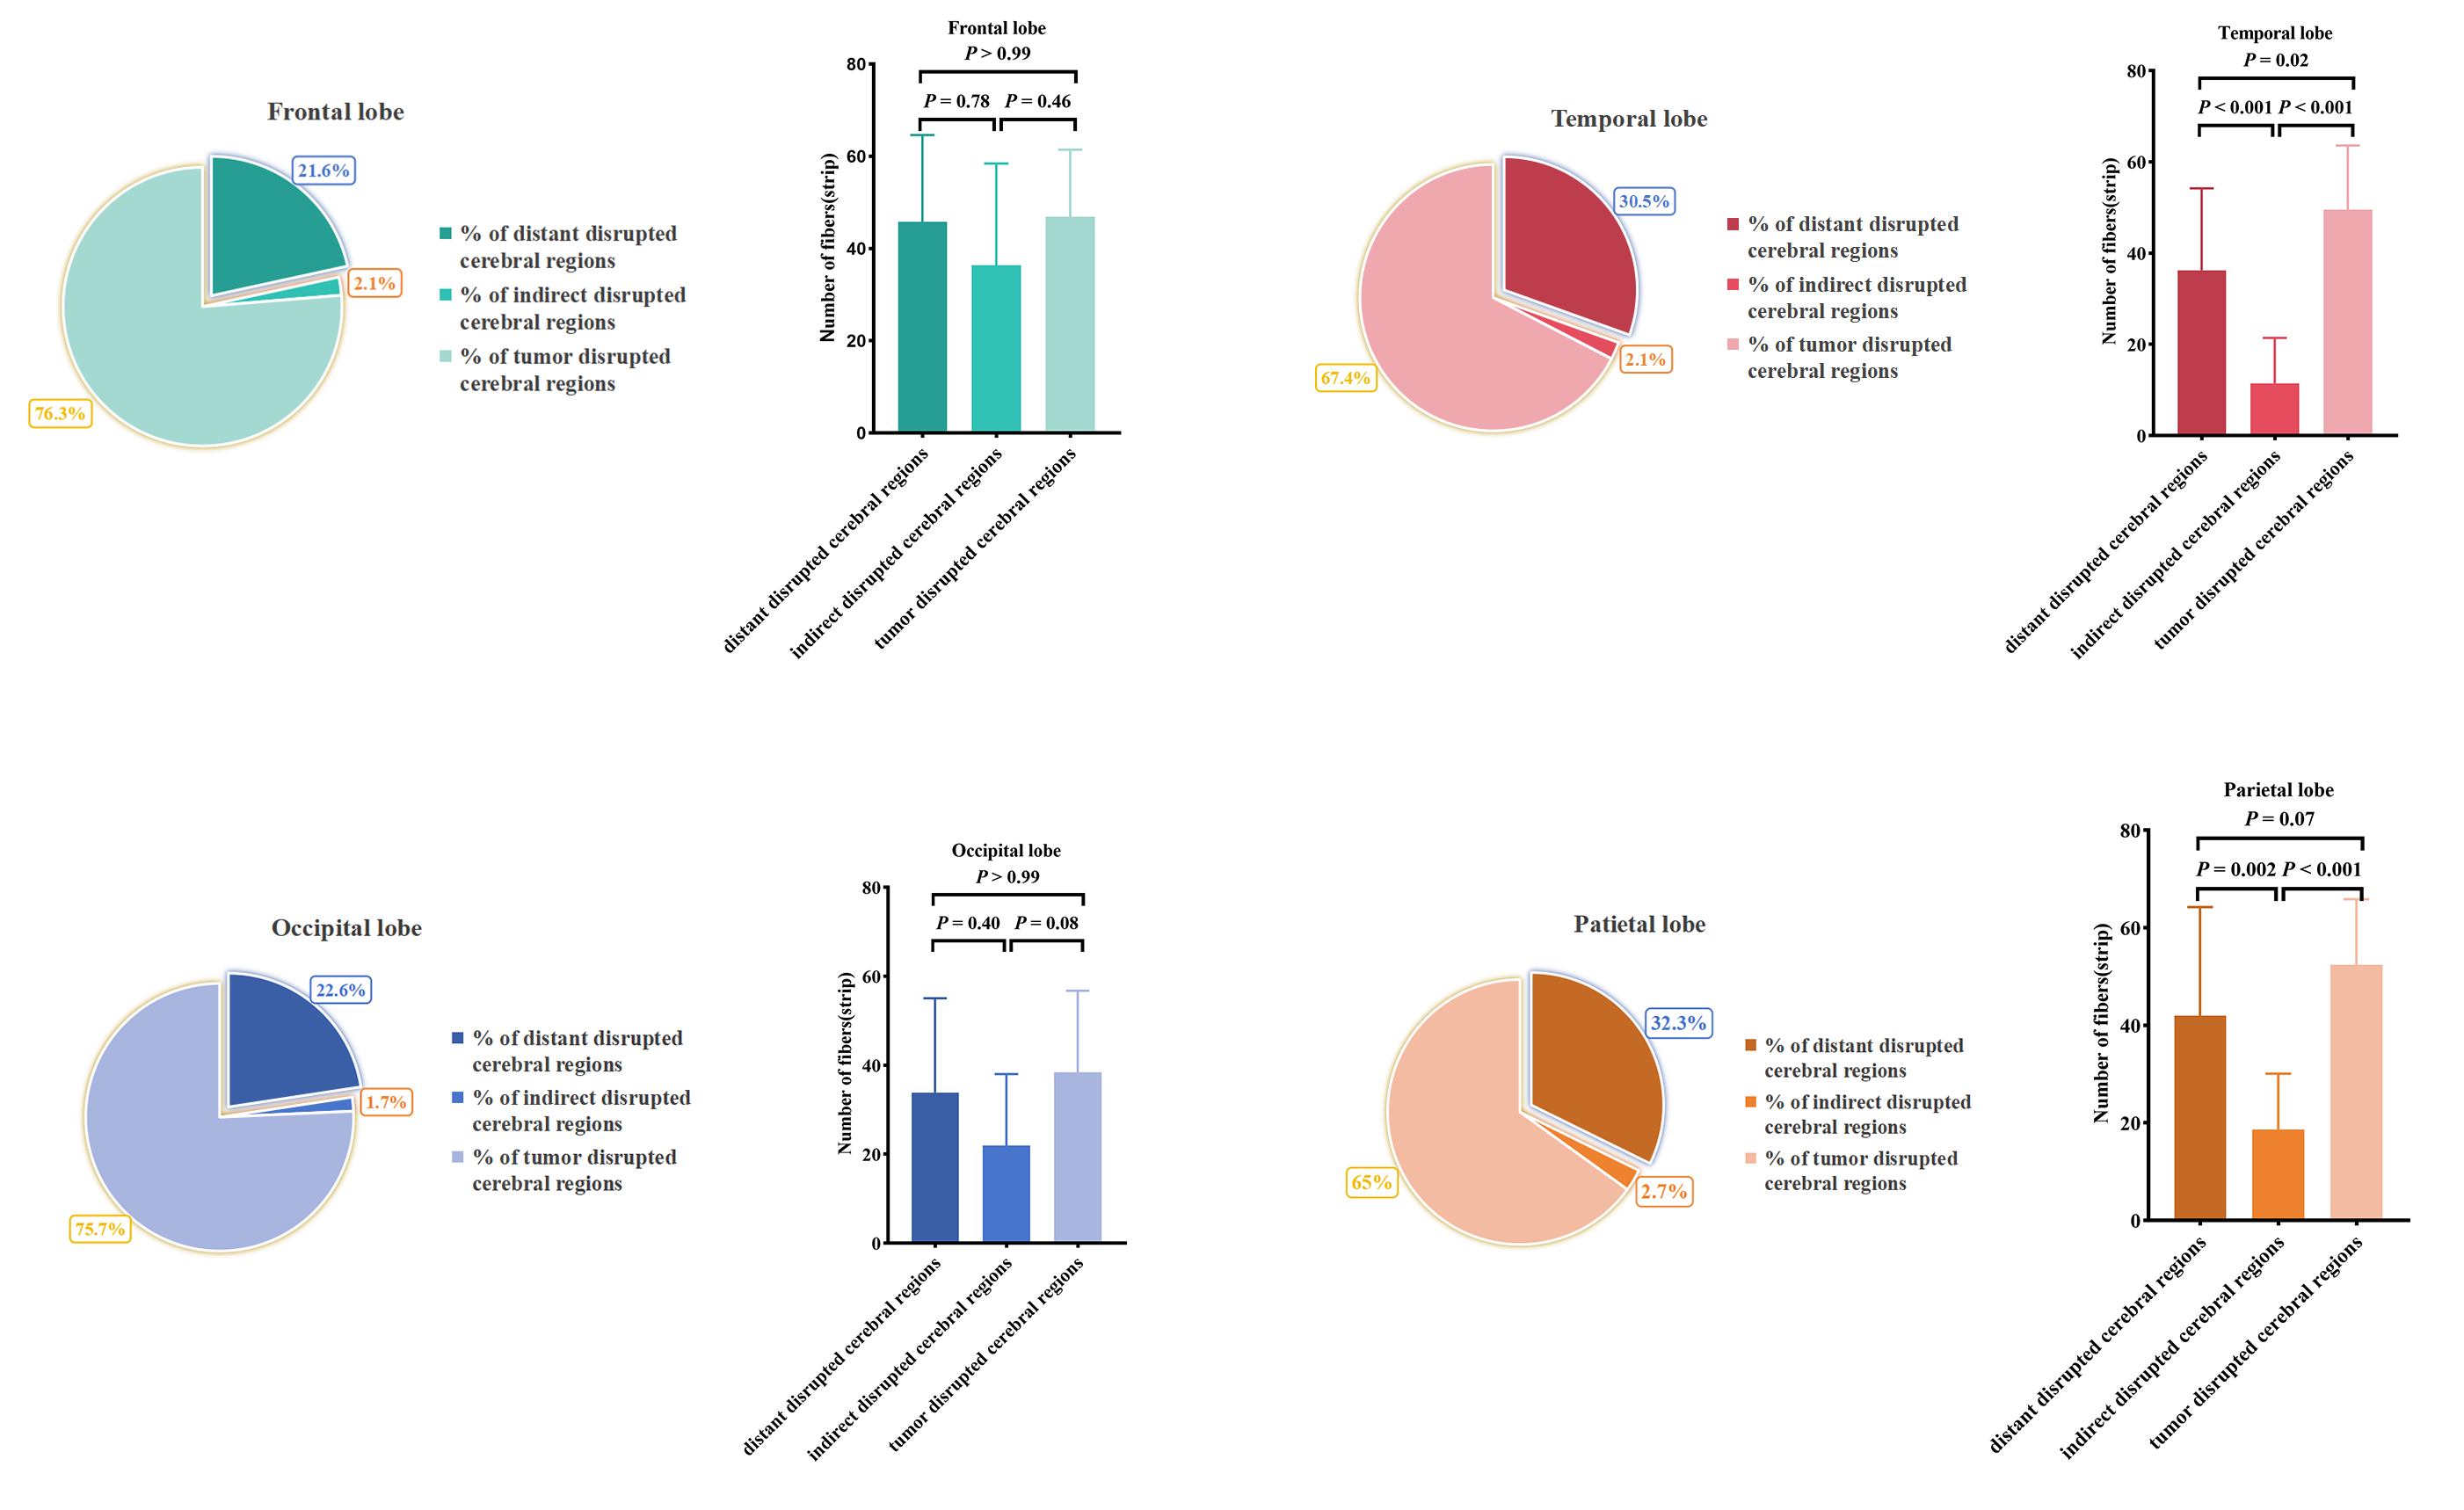


Figure S3. The post hoc analysis of the disrupted fibers in three types of cerebral regions at the different cerebral lobes. The fiber disruption in different cerebral lobes after GBM surgery is primarily characterized by direct disruption. And, there were significant statistical difference between the number of disrupted fibers in the three types of cerebral regions at the temporal lobe and parietal lobe.
